# Supplementary material for: Mesenchymal stromal cells mediated delivery of photoactive nanoparticles inhibits osteosarcoma growth in vitro and in a murine in vivo ectopic model
Source: Springer Nature journal article supplement (doi:10.1186/s13046-020-01548-4), 2020-02-22
Supplement: MOESM2 [file 17734492]

**Table 1S. MSCs characterization and in-process data. –**

The table shows data related to isolation (CFU assay; cell yield); expansion (CPDs); osteogenic, adipogenic, chondrogenic differentiation assays; and immunophenotype profiles of the 5 isolated MSCs lines.

| MSCs ID# in the manuscript | Donor <sup>a</sup> (ID#/gender/age) | CFU-F/10 <sup>6</sup> cells <sup>b</sup> (before/after isolation) | P0 yield <sup>c</sup> (x10 <sup>6</sup> )/days | P0→P1 yield <sup>d</sup> (harvested cells per cm <sup>2</sup> /days) | P1→P2 yield <sup>d</sup> (harvested cells per cm <sup>2</sup> /days) | P1 cumulative PDs <sup>e</sup> | P2 cumulative PDs <sup>e</sup> | P6 cumulative PDs <sup>e</sup> | P10 cumulative PDs <sup>e</sup> | P3 diff. score <sup>f</sup> (osteo/adipo/condro) |
|----------------------------|-------------------------------------|-------------------------------------------------------------------|------------------------------------------------|----------------------------------------------------------------------|----------------------------------------------------------------------|--------------------------------|--------------------------------|--------------------------------|---------------------------------|--------------------------------------------------|
| 1                          | 268/F/13                            | 53/67                                                             | 2.95/13                                        | 1.39x10 <sup>4</sup> /19                                             | 1.42x10 <sup>4</sup> /25                                             | J+2.79                         | J+6.88                         | J+18.92                        | 29.78                           | 1/2/4                                            |
| 2                          | 269/M/36                            | 130/93                                                            | 4.88/13                                        | 2.55x10 <sup>4</sup> /19                                             | 2.53x10 <sup>4</sup> /25                                             | J+3.67                         | J+5.62                         | J+20.87                        | 29.50                           | 2/2/4                                            |
| 3                          | 272/F/22                            | 90/87                                                             | 4.99/14                                        | 2.35x10 <sup>4</sup> /21                                             | 2.18x10 <sup>4</sup> /28                                             | J+3.56                         | J+7.00                         | J+19.12                        | 28.01                           | 2/3/2                                            |
| 4                          | 273/M/42                            | 83/70                                                             | 3.92/13                                        | 1.70x10 <sup>4</sup> /20                                             | 9.62x10 <sup>3</sup> /27                                             | J+3.08                         | J+5.35                         | J+16.73                        | 20.47                           | 3/2/3                                            |
| 5                          | 274/M/15                            | 70/147                                                            | 3.79/12                                        | 2.61x10 <sup>4</sup> /19                                             | 1.73x10 <sup>4</sup> /26                                             | J+3.71                         | J+6.82                         | J+16.2                         | 26.67                           | 2/1/4                                            |

| MSC ID# | P3 epitopes <sup>g</sup> (-) |      |      |      | P3 epitopes <sup>g</sup> (+) |      |
|---------|------------------------------|------|------|------|------------------------------|------|
|         | CD14                         | CD31 | CD34 | CD45 | CD90                         | CD73 |
| 1       | 2                            | 2    | 6    | 14   | 100                          | 95   |
| 2       | 1                            | 1    | 3    | 9    | 100                          | 93   |
| 3       | 1                            | 1    | 2    | 5    | 100                          | 88   |
| 4       | 0                            | 0    | 12   | 5    | 100                          | 98   |
| 5       | 0                            | 0    | 0    | 0    | 100                          | 97   |

<sup>a</sup>Donors identified by anonymous number, gender and age.

<sup>b</sup> CFU-f obtained as previously described from bone marrow sample (before isolation) and from mononuclear cells isolated by density gradient (after isolation)

<sup>c</sup>P0 yield defined as number of cells (as millions) obtained by plating mononuclear cells from Ficoll gradient at high density, (400000 cells per cm<sup>2</sup>)/days cells were incubated.

<sup>d</sup>P1/P2 yields defined by number of cells harvested per cm<sup>2</sup>/days of incubation.

<sup>e</sup>Cumulative PDs defined as J+ observed value because number of population doublings required to generate P0 cells cannot be estimated.

<sup>f</sup> Scores of differentiation assays. Scores from 0 to 5 were defined comparing the results to the percentile originated from the lab's historical database (0 if <5<sup>th</sup>, 1 if between 5<sup>th</sup> and 25<sup>th</sup>, 2 if between 25<sup>th</sup> and 50<sup>th</sup>, 3 if between 50<sup>th</sup> and 75<sup>th</sup>, 3 if between 75<sup>th</sup> and 95<sup>th</sup>).

<sup>g</sup>Positive epitopes (CD14, CD31, CD34, CD45) and negative epitopes (CD73, CD90) cell percentages in passage 3 populations.

Abbreviations: CFU, colony-forming unit; F, female; M, male; PDs, population doublings
