# Supplementary material for: Mesenchymal stromal cells mediated delivery of photoactive nanoparticles inhibits osteosarcoma growth in vitro and in a murine in vivo ectopic model
Source: Springer Nature journal article supplement (doi:10.1186/s13046-020-01548-4), 2020-02-22
Supplement: MOESM3 [file 17734492]

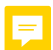

**Table 2S. FNPs hydrodynamic diameters.**

Hydrodynamic FNPs diameter measurements by dynamic light scattering (mQ water). Hydrodynamic diameter of the nanoparticles was determined by photon correlation spectroscopy (PCS) at 25 °C using a NanoBrook Omni Particle Size Analyzer (Brookhaven Instruments Corporation, USA) equipped with a 35 mW red diode laser (nominal 640 nm wave-length).

| Run             | Eff. Diam. (nm) | Polydispersity |
|-----------------|-----------------|----------------|
| 1               | 76.87           | 0.183          |
| 2               | 76.76           | 0.134          |
| 3               | 75.92           | 0.155          |
| 4               | 74.53           | 0.187          |
| 5               | 71.95           | 0.167          |
| <b>Mean:</b>    | 75.21           | 0.165          |
| <b>Std Err:</b> | 0.92            | 0.010          |
| <b>Std Dev:</b> | 2.05            | 0.022          |

**Table 3S. Zeta-potential measurements of FNPs (mQ water).** Zeta-potential was measured at 25 °C using a NanoBrook Omni Particle Size Analyzer (Brookhaven Instruments Corporation, USA) equipped with a 35 mW red diode laser (nominal 640 nm wave-length).

| Run             | Zeta-potential (mV) |
|-----------------|---------------------|
| 1               | 55.99               |
| 2               | 57.10               |
| 3               | 49.09               |
| 4               | 49.65               |
| 5               | 58.99               |
| <b>Mean:</b>    | 54.16               |
| <b>Std Err:</b> | 1.80                |
| <b>Std Dev:</b> | 4.03                |

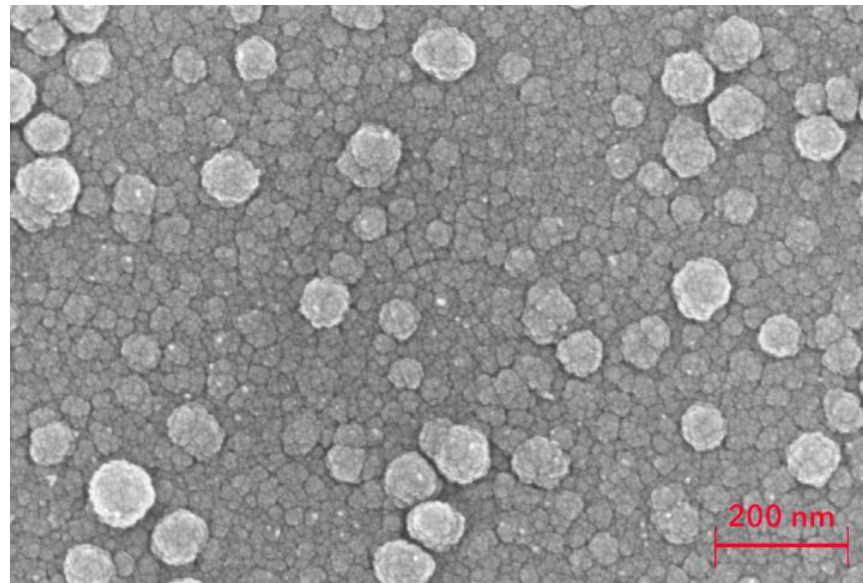

**Figure 1S. FNPs scanning electron microscope (SEM) image.**

Particles morphology was studied using the EVO LS 10 LaB6 scanning electron microscopy (SEM) (Zeiss, Italy) with an acceleration voltage of 5 kV and a working distance of 5 mm. The samples were sputter coated under vacuum with a thin layer (10–30 Å) of gold. Z-range =  $63 \pm 13$  nm.
