# Supplementary material for: Mesenchymal stromal cells mediated delivery of photoactive nanoparticles inhibits osteosarcoma growth in vitro and in a murine in vivo ectopic model
Source: Springer Nature journal article supplement (doi:10.1186/s13046-020-01548-4), 2020-02-22
Supplement: MOESM4 [file 17734492]

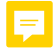

(a)

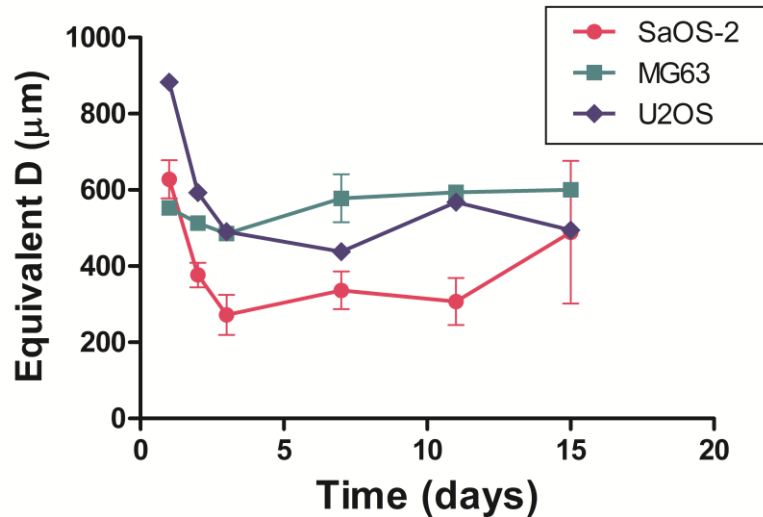

(b)

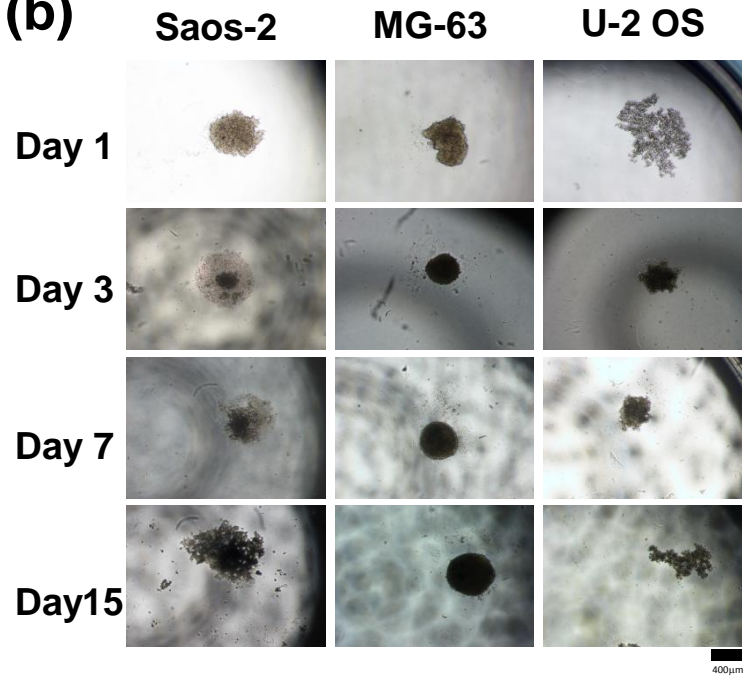

**Figure 2S. 3D model characterization**

Diameter measures (mean  $\pm$  SD, n=6) from day1 to day15 of spheroids prepared with the 3 OS cells lines (a) and representative images of spheroids prepared with  $10^4$  OS cells (scale bar=400 $\mu$ m)(b).

**Table 4S. Measures of 3D model morphological properties**

|                                     | Saos-2 |     |   | MG-63 |     |   | U-2 OS |     |   |
|-------------------------------------|--------|-----|---|-------|-----|---|--------|-----|---|
|                                     | Mean   | CV% | N | Mean  | CV% | N | Mean   | CV% | N |
| <b>Diameter (<math>\mu</math>m)</b> | 272    | 19  | 6 | 485   | 9   | 6 | 490    | 10  | 6 |
| <b>Roughness (perfect sphere=1)</b> | 1,57   | 15  | 6 | 1,23  | 17  | 6 | 1,92   | 25  | 6 |

Diameter and roughness coefficient measures from brightfield images of spheroids obtained from different OS cell lines after 3 days of culture in low attachment 96-well plate.
