# Supplementary material for: Mesenchymal stromal cells mediated delivery of photoactive nanoparticles inhibits osteosarcoma growth in vitro and in a murine in vivo ectopic model
Source: Springer Nature journal article supplement (doi:10.1186/s13046-020-01548-4), 2020-02-22
Supplement: MOESM5 [file 17734492]

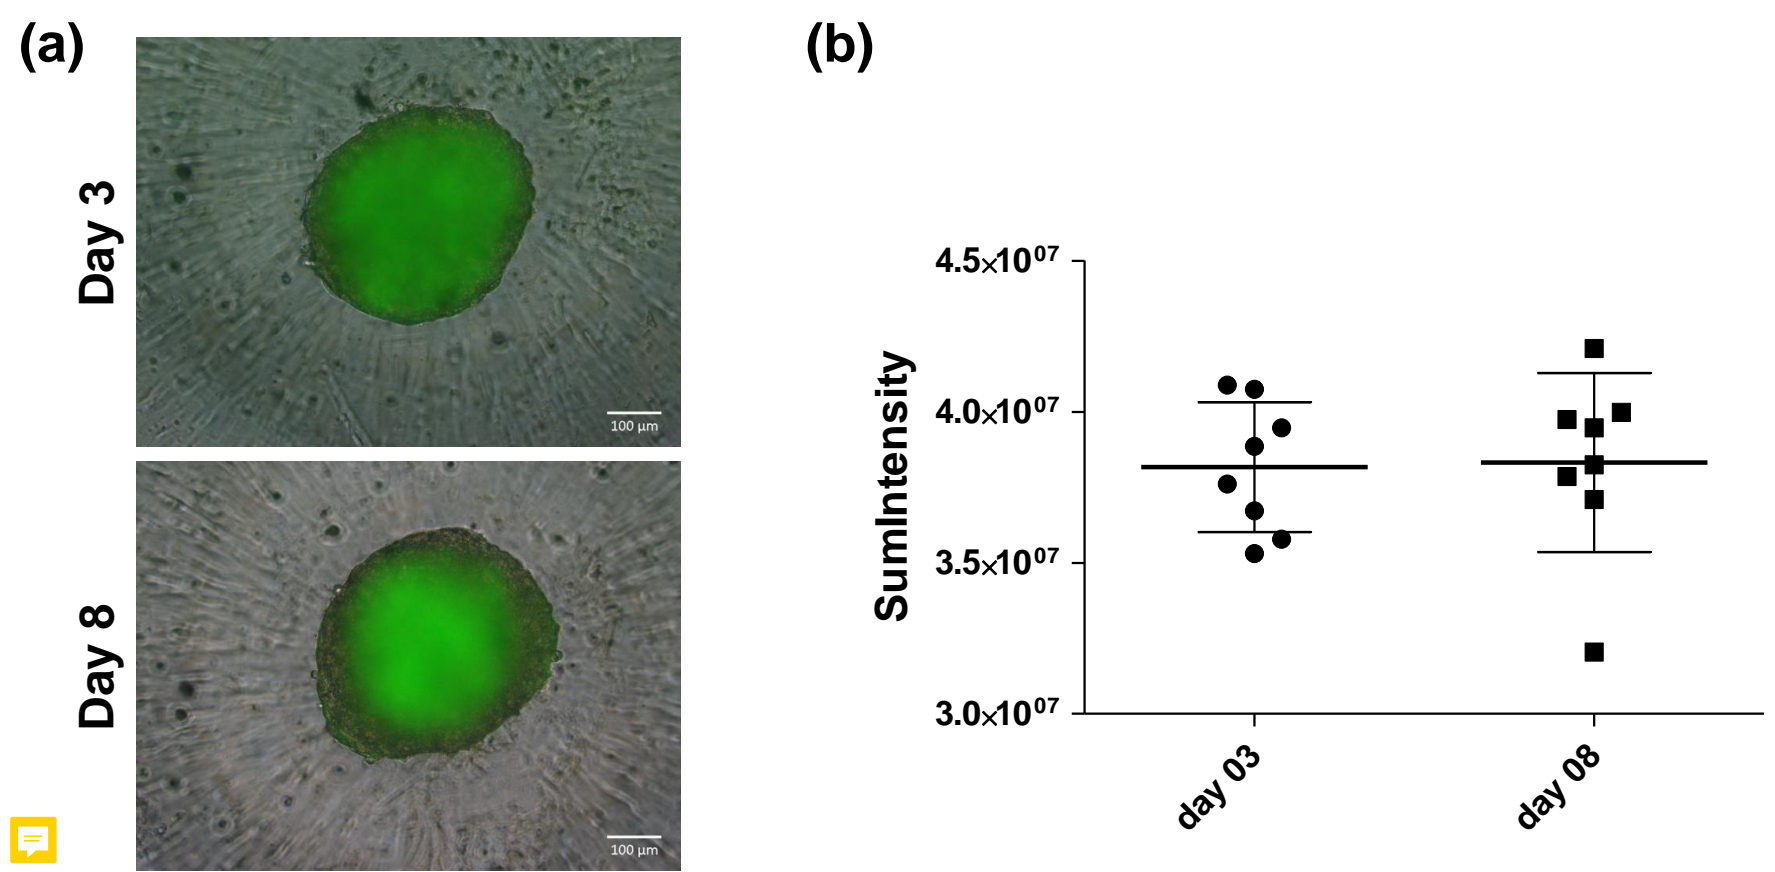

**Figure 3S. FNPs retention inside multicellular spheroids.**

Representative images of spheroids composed by MG-63 and AIPcS<sub>4</sub>@FNPs loaded MSC in 1:1 ratio, after 3 and 8 days of culture, showing the green fluorescent emission of AIPcS<sub>4</sub>@FNPs superimposed on the brightfield images of the whole spheroids (a). Quantification of fluorescence intensity inside the spheroids (n=8) at the indicated timepoints; the spheroids' perimeters traced on brightfield images were superimposed to corresponding fluorescent images to select a ROI and obtain the total intensity of green channel in the selected area (b).
