# Supplementary material for: Mesenchymal stromal cells mediated delivery of photoactive nanoparticles inhibits osteosarcoma growth in vitro and in a murine in vivo ectopic model
Source: Springer Nature journal article supplement (doi:10.1186/s13046-020-01548-4), 2020-02-22
Supplement: MOESM6 [file 17734492]

**AIPcS<sub>4</sub>@NP@MSCs:MG-63**  
**Ratio 1:1**

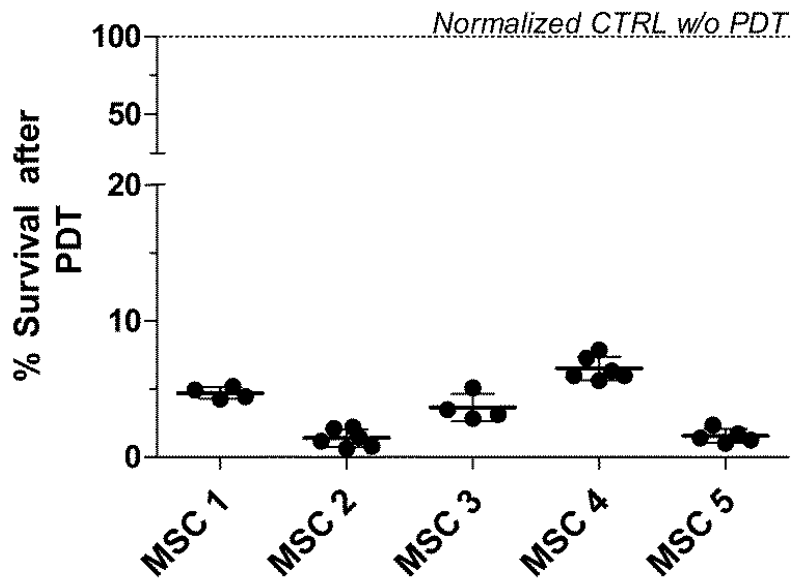

**Figure 4S. Survival rate tested in 5 MSC lines isolated from patients.**

Quantification of vitality by ATP assay (Cell Titer Glo 3D) 24h after 10 minutes PDT in 5 MSCs cell lines loaded with 90ug/ml AIPcS<sub>4</sub>@NPs in co-culture with MG-63 cells in ratio 1:1.
