# Supplementary material for: Mesenchymal stromal cells mediated delivery of photoactive nanoparticles inhibits osteosarcoma growth in vitro and in a murine in vivo ectopic model
Source: Springer Nature journal article supplement (doi:10.1186/s13046-020-01548-4), 2020-02-22
Supplement: MOESM7 [file 17734492]

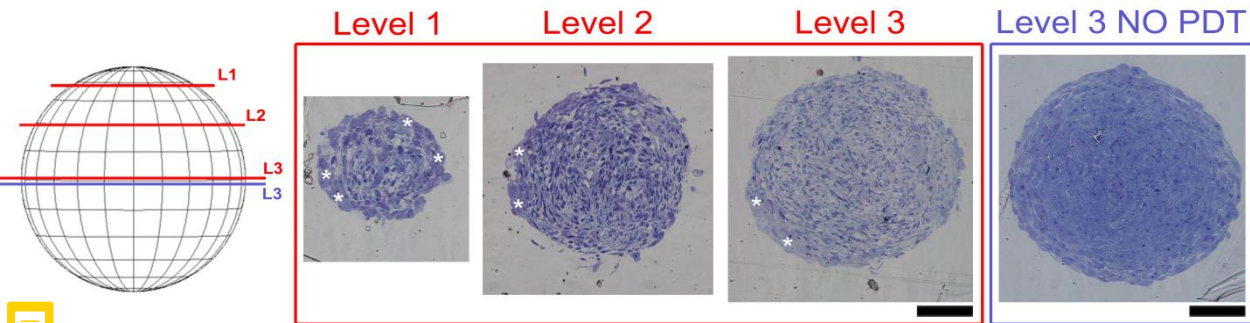

### Figure 5S. Full depth analysis of resin embedded spheroids

Toluidine blue stained semi-thin slices of one multicellular spheroid composed by AIPcS<sub>4</sub>@NPs loaded MSCs and MG-63 in a 1:7 ratio after 10 min irradiation (scale bar=100 $\mu$ m). Asterisks mark the areas where intact cells were observed. Slices correspond to different axial planes during cutting session as schematically explained in the first row. The location of each slice on the vertical axis depicted in the cartoon is approximated and arbitrary, since the orientation of the spheroids during cutting cannot be correlated with the orientation of the spheroid during PDT treatment. A central slice of a not irradiated spheroid is showed as positive control for the staining (blue frame).
