# Supplementary material for: Mesenchymal stromal cells mediated delivery of photoactive nanoparticles inhibits osteosarcoma growth in vitro and in a murine in vivo ectopic model
Source: Springer Nature journal article supplement (doi:10.1186/s13046-020-01548-4), 2020-02-22
Supplement: MOESM8 [file 17734492]

AIPcS<sub>4</sub>

AIPcS<sub>4</sub>@FNPs

AIPcS<sub>4</sub>@FNPs@MSCs

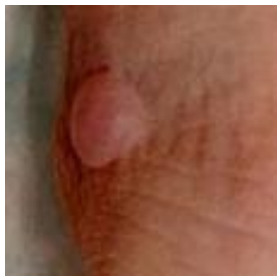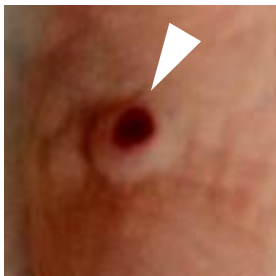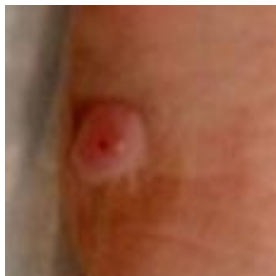

 **Figure 6S. Representative imaging of photodynamic therapy effect on tumor bearing mice**

Representative images of photoirradiated tumor on mouse left flank. Characteristic burn/scab formation was observed 24h after second treatment in mice injected with AIPcS<sub>4</sub>@FNPs NPs alone (white arrowhead).
